# Supplementary material for: Rsp5 and Mdm30 reshape the mitochondrial network in response to age-induced vacuole stress
Source: PubMed Central journal article supplement — Mol Biol Cell. 2019 Aug 1;30(17):2141–54. doi: 10.1091/mbc.E19-02-0094 (PMC6743467; doi:10.1091/mbc.e19-02-0094), 2019-08-01
Supplement: mbc-30-2141-s001.pdf [file mbc-30-2141-s001.pdf]

# Supplemental Materials

*Molecular Biology of the Cell*

Goodrum et al.

## Supplemental Figure 1

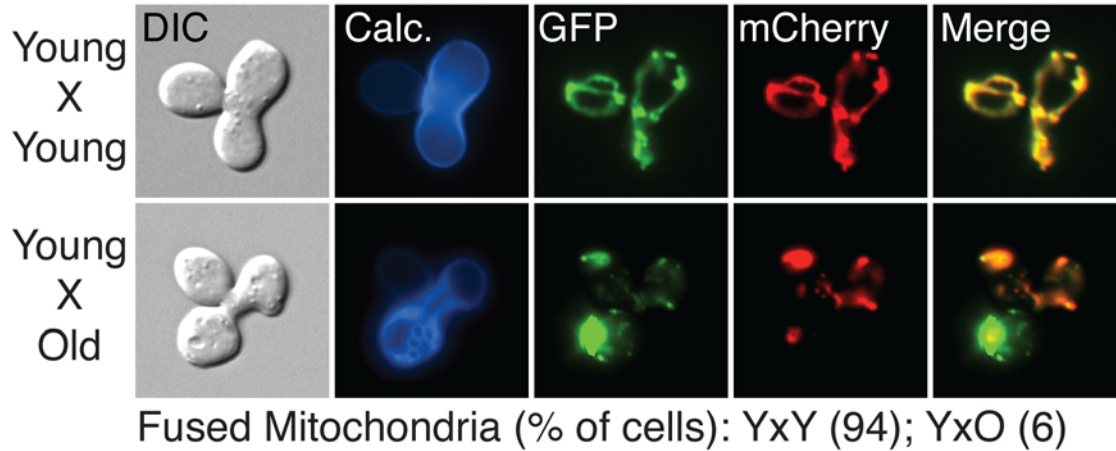

### Supplemental Figure 1. Mitochondrial fusion is impaired during mating of young and old zygote pairs.

Representative single Z-plane fluorescent images of wild-type zygotes derived from mating of young Tom70-mCherry and old Tom70-GFP expressing haploid cells.  $n = 50$  cells. Young and old cells identified by bud scar levels after calcofluor staining.

## Supplemental Figure 2

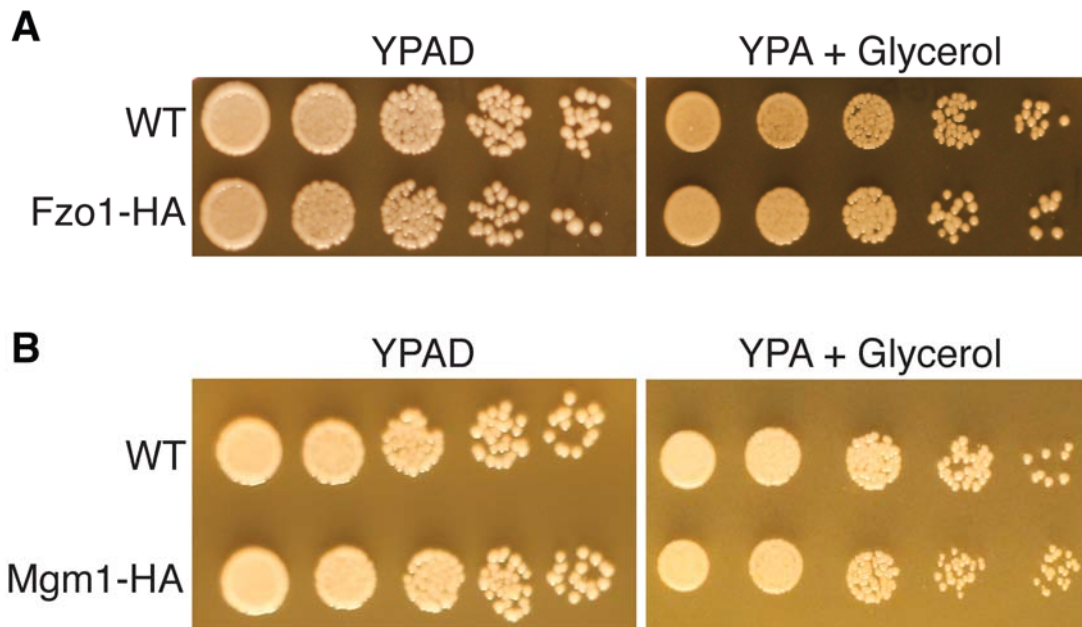

### Supplemental Figure 2. HA-epitope tagged Fzo1 and Mgm1 are functional.

A-B) Serial dilutions of wild-type (WT) and Fzo1-HA(A) or Mgm1-HA(B) expressing strains were plated on rich medium containing glucose (YPAD) or glycerol (YPA + Glycerol).

### Supplemental Figure 3

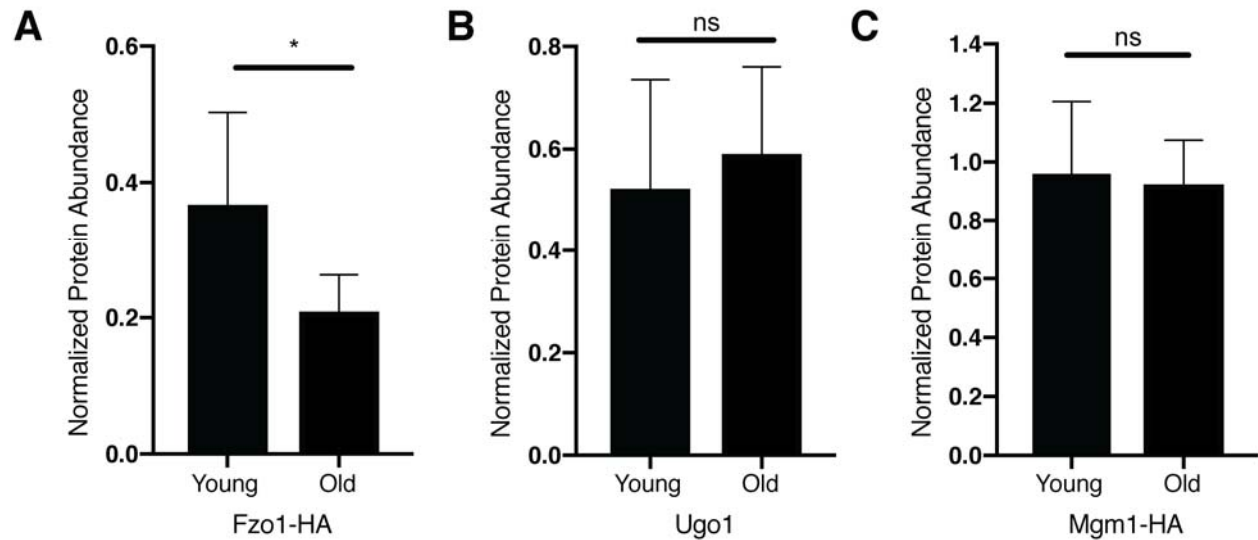

**Supplemental Figure 3. Western blot quantification of mitochondrial fusion protein levels.**

Fzo1-HA(A), Ugo1(B), and Mgm1-HA(C) protein levels from four technical replicate western blots run in parallel to Figure 1D were quantified by measuring the integrated density of each band in Image J/Fiji, and normalized to levels of Pgk1. Error bars represent standard error of the mean of four technical replicates. p values were determined via paired t-test. ns = not significant, \* = p < 0.05).

## Supplemental Figure 4

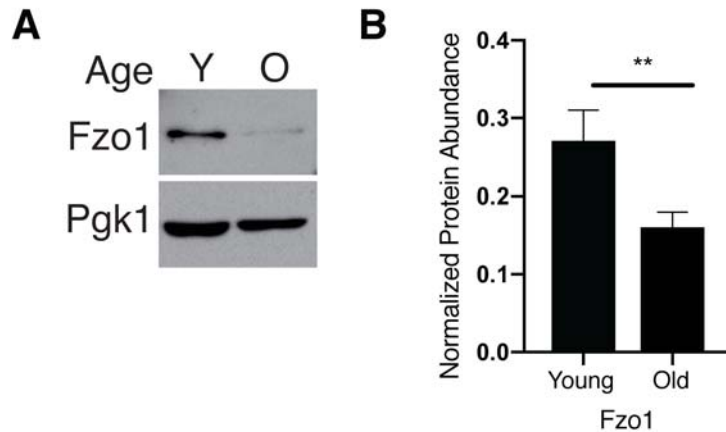

### Supplemental Figure4. Endogenous Fzo1 is reduced in aged cells.

A) Whole cell extracts from young (Y) and old (O) cells were analyzed by Western blot with anti-Fzo1 and anti-PGK antibodies. Age ranges ( $n = 30$  cells): Y = 0-3, O = 12-15.

B) Endogenous Fzo1 protein levels from five technical replicate western blots run in parallel to Supplemental Figure 4A were quantified by measuring the integrated density of each band in Image J/Fiji, and normalized to levels of Pgk1. Error bars represent standard error of the mean of five technical replicates.  $p$  values were determined via paired t-test. \*\* =  $p < 0.005$ ).

## Supplemental Figure 5

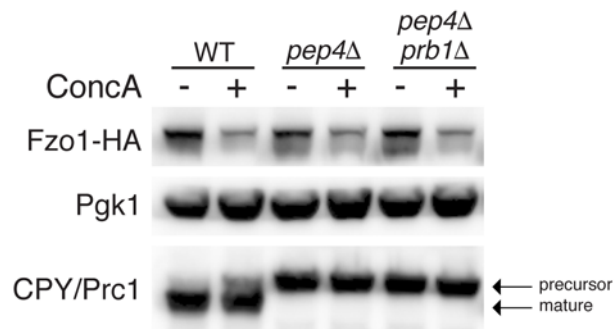

**Supplemental Figure 5. *pep4Δ* and *pep4Δprb1Δ* yeast are deficient in vacuole function and still exhibit ConcA-mediated Fzo1 decline.**

Whole cell extracts from wild-type (WT), *pep4Δ*, and *pep4Δprb1Δ* yeast expressing Fzo1-HA grown in the absence or presence of concanamycin A for four hours were analyzed by Western blot with anti-HA, anti-Pgk1, and anti-Prc1 (CPY) antibodies.

Accumulation of the precursor form of Prc1 is an indicator of impaired vacuolar proteolysis.

## Supplemental Figure 6

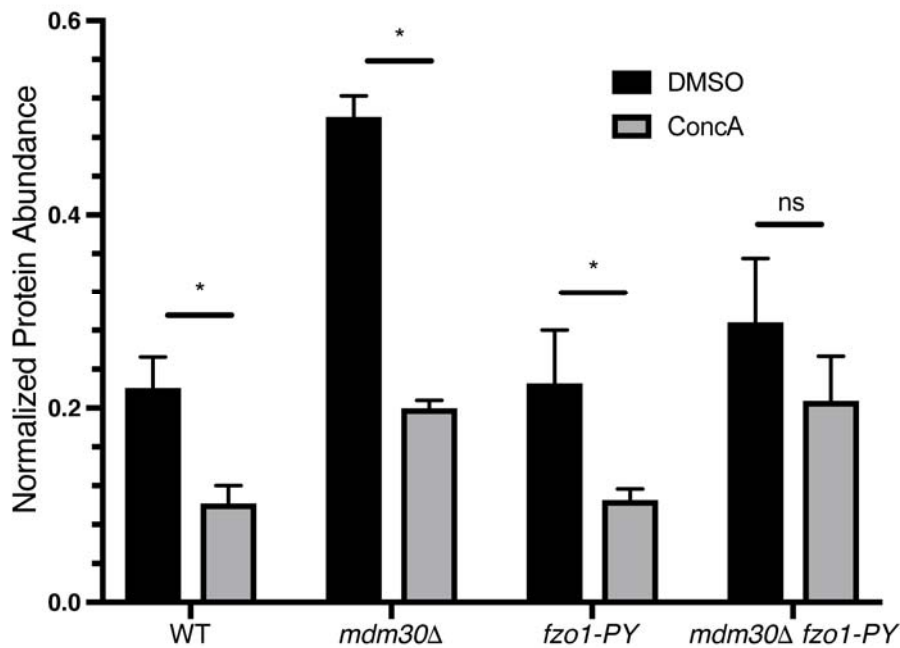

### Supplemental Figure 6. Western blot quantification of Fzo1-HA levels in *mdm30Δfzo1-PY* mutant yeast.

Fzo1-HA protein levels from three technical replicate western blots run in parallel to Figure 4D were quantified by measuring the integrated density of each band in Image J/Fiji, and normalized to levels of Pgk1. Error bars represent standard error of the mean of three technical replicates. p values were determined via paired t-test. ns = not significant, \* = p < 0.05).



## Supplemental Figure 7

**A**

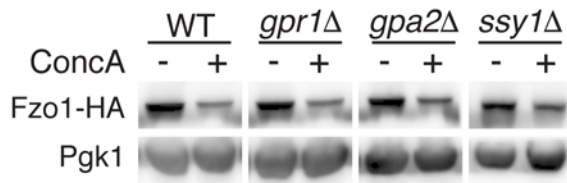

**B**

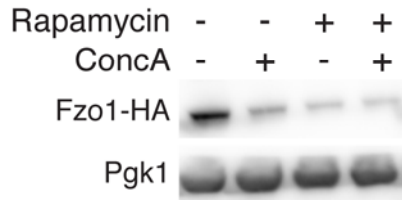

**C**

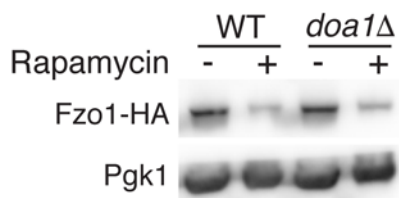

### Supplemental Figure 7. Common nutrient sensing pathways are not involved in vacuole-induced Fzo1 decline.

A) Whole cell extracts from wild-type (WT), *gpr1*Δ, *gpa2*Δ, and *ssy1*Δ yeast expressing Fzo1-HA grown in the absence or presence of concanamycin A for four hours were analyzed by Western blot with anti-HA and anti-Pgk1 antibodies.

B) Whole cell extracts from wild-type (WT) yeast expressing Fzo1-HA grown in the absence or presence of concanamycin A and/or rapamycin for four hours were analyzed by Western blot with anti-HA and anti-Pgk1 antibodies.

C) Whole cell extracts from wild-type (WT) and *doa1*Δ yeast expressing Fzo1-HA grown in the absence or presence of rapamycin for four hours were analyzed by Western blot with anti-HA and anti-Pgk1 antibodies.
